# Supplementary material
Source: MDPI journal article supplement (https://www.mdpi.com/2673-7272/1/4/26)
Supplement: s1 [file s1 › disabilities-1371555-supplementary.pdf]

**Table S1.** Demographic, social, and clinical characteristics of participants in the Ask study who completed CHAP health check booklets (n = 176).

| Characteristic                                                                      | Total (n, %) | Special Education School (n, %) | Special Education Unit in mainstream school (n, %) |
|-------------------------------------------------------------------------------------|--------------|---------------------------------|----------------------------------------------------|
| <b>Age (years)</b>                                                                  |              |                                 |                                                    |
| 10-13                                                                               | 39 (22.2%)   | 31 (32.0%)                      | 8 (10.1%)                                          |
| 14-15                                                                               | 75 (42.6%)   | 35 (36.1%)                      | 40 (50.6%)                                         |
| 16-18                                                                               | 62 (35.2%)   | 31 (32.0%)                      | 31 (39.2%)                                         |
| <b>Gender</b>                                                                       |              |                                 |                                                    |
| Male                                                                                | 97 (55.1%)   | 56 (57.7%)                      | 41 (51.9%)                                         |
| <b>Aetiology of Intellectual Disability</b>                                         |              |                                 |                                                    |
| Down syndrome                                                                       | 26 (14.8%)   | 21 (21.7%)                      | 5 (6.3%)                                           |
| Other known cause                                                                   | 58 (33.0%)   | 37 (38.1%)                      | 21 (26.6%)                                         |
| Unknown cause                                                                       | 92 (52.3%)   | 39 (40.2%)                      | 53 (67.1%)                                         |
| <b>Carer's highest level of education<sup>1</sup></b>                               |              |                                 |                                                    |
| Diploma; bachelor degree; graduate diploma or certificate, or a postgraduate degree | 41 (23.6%)   | 30 (31.6%)                      | 11 (13.9%)                                         |
| None of these above                                                                 | 133 (76.4%)  | 65 (68.4%)                      | 68 (86.1%)                                         |
| <b>Location ranked by level of socio-economic advantage</b>                         |              |                                 |                                                    |
| Low                                                                                 | 56 (31.8%)   | 21 (21.7%)                      | 35 (44.3%)                                         |
| Medium                                                                              | 73 (41.5%)   | 43 (44.3%)                      | 30 (38.0%)                                         |
| High                                                                                | 47 (26.7%)   | 33 (34.0%)                      | 14 (17.7%)                                         |
| <b>General health status ranked by carers</b>                                       |              |                                 |                                                    |
| Very good/excellent                                                                 | 111 (63.1%)  | 61 (62.9%)                      | 50 (63.3%)                                         |
| Fair/good                                                                           | 63 (35.8%)   | 34 (35.1%)                      | 29 (36.7%)                                         |
| Poor                                                                                | 2 (1.1%)     | 2 (2.1%)                        | 0 (0.0%)                                           |
| <b>Known health conditions reported by carers<sup>2</sup></b>                       |              |                                 |                                                    |
| Having at least one chronic physical or psychiatric condition known by carers       | 120 (68.6%)  | 70 (72.2%)                      | 50 (64.1%)                                         |
| Having at least one chronic physical condition known by carers                      | 118 (67.4%)  | 69 (71.1%)                      | 49 (62.8%)                                         |
| Epilepsy                                                                            | 32 (18.3%)   | 23 (24.0%)                      | 9 (11.4%)                                          |
| Heart condition                                                                     | 18 (10.2%)   | 12 (12.4%)                      | 6 (7.6%)                                           |
| Psychiatric condition                                                               | 8 (4.6%)     | 4 (4.1%)                        | 4 (5.1%)                                           |
| Thyroid problems                                                                    | 5 (2.8%)     | 2 (2.1%)                        | 3 (3.8%)                                           |
| Reflux oesophagitis                                                                 | 9 (5.1%)     | 6 (6.3%)                        | 3 (3.8%)                                           |
| Aspiration                                                                          | 4 (2.3%)     | 3 (3.1%)                        | 1 (1.3%)                                           |

<sup>1</sup> Missing information for 2 participants

<sup>2</sup> Number of "don't know" responses for known health conditions reported by carers: having at least one chronic physical or psychiatric condition known by carers: 1 (in special education units), having at least one chronic physical condition known by carers: 1 (in special education units), epilepsy: 1 (1 in special education schools), heart condition: 0, psychiatric condition: 0, thyroid problems: 0, reflux oesophagitis: 1 (1 in special education schools), aspiration: 0

**Table S2.** Responses for selected behaviour problems for participants who completed baseline questionnaires (n = 592).

| Behaviour problems <sup>1</sup>                                      | Total<br>(n, %) |                                  |                               | Special education school<br>(n, %) |                                  |                               | Special education unit in mainstream<br>school (n, %) |                                  |                               |
|----------------------------------------------------------------------|-----------------|----------------------------------|-------------------------------|------------------------------------|----------------------------------|-------------------------------|-------------------------------------------------------|----------------------------------|-------------------------------|
|                                                                      | Not true        | Somewhat or<br>sometimes<br>true | Very true<br>or often<br>true | Not true                           | Somewhat or<br>sometimes<br>true | Very true<br>or often<br>true | Not true                                              | Somewhat or<br>sometimes<br>true | Very true<br>or often<br>true |
| Become over-excited                                                  | 145 (24.9%)     | 212 (36.4%)                      | 225 (38.7%)                   | 57 (18.0%)                         | 114 (36.1%)                      | 145 (45.9%)                   | 88 (33.1%)                                            | 98 (36.8%)                       | 80 (30.1%)                    |
| Stubborn, disobedient or<br>uncooperative                            | 156 (26.7%)     | 276 (47.2%)                      | 153 (26.2%)                   | 79 (25.0%)                         | 145 (45.9%)                      | 92 (29.1%)                    | 77 (28.6%)                                            | 131 (48.7%)                      | 61 (22.7%)                    |
| Upset and distressed over small<br>changes in routine or environment | 184 (31.4%)     | 194 (33.1%)                      | 208 (35.5%)                   | 78 (24.7%)                         | 108 (34.2%)                      | 130 (41.1%)                   | 106 (39.3%)                                           | 86 (31.9%)                       | 78 (28.9%)                    |
| Tense, anxious, worried                                              | 183 (31.6%)     | 260 (44.8%)                      | 137 (23.6%)                   | 103 (32.9%)                        | 127 (40.6%)                      | 83 (26.5%)                    | 80 (30.0%)                                            | 133 (49.8%)                      | 54 (20.2%)                    |
| Preoccupied with only one or two<br>particular interests             | 193 (34.2%)     | 128 (22.7%)                      | 244 (43.2%)                   | 85 (27.5%)                         | 69 (22.3%)                       | 155 (50.2%)                   | 108 (42.2%)                                           | 59 (23.1%)                       | 89 (34.8%)                    |
| Kicks, hits others                                                   | 286 (48.9%)     | 182 (31.1%)                      | 117 (20.0%)                   | 140 (44.3%)                        | 103 (32.6%)                      | 73 (23.1%)                    | 146 (54.3%)                                           | 79 (29.4%)                       | 44 (16.4%)                    |
| Wanders aimlessly                                                    | 400 (68.5%)     | 118 (20.2%)                      | 66 (11.3%)                    | 202 (63.7%)                        | 68 (21.5%)                       | 47 (14.8%)                    | 198 (74.2%)                                           | 50 (18.7%)                       | 19 (7.1%)                     |
| Refuses to go to school, activity<br>centre or workplace             | 399 (68.7%)     | 146 (25.1%)                      | 36 (6.2%)                     | 227 (72.3%)                        | 69 (22.0%)                       | 18 (5.7%)                     | 172 (64.4%)                                           | 77 (28.8%)                       | 18 (6.7%)                     |
| Has nightmare, night terrors or<br>walks in sleep                    | 404 (70.1%)     | 117 (20.3%)                      | 55 (9.6%)                     | 214 (68.8%)                        | 63 (20.3%)                       | 34 (10.9%)                    | 190 (71.7%)                                           | 54 (20.38%)                      | 21 (7.9%)                     |
| Inappropriate sexual activity with<br>another                        | 489 (84.3%)     | 59 (10.2%)                       | 32 (5.5%)                     | 257 (81.9%)                        | 36 (11.5%)                       | 21 (6.7%)                     | 232 (87.2%)                                           | 23 (8.7%)                        | 11 (4.1%)                     |
| Sees, hears something which is not<br>there                          | 507 (87.0%)     | 49 (8.4%)                        | 27 (4.6%)                     | 273 (87.2%)                        | 23 (7.4%)                        | 17 (5.4%)                     | 234 (86.7%)                                           | 26 (9.6%)                        | 10 (3.7%)                     |

<sup>1</sup> Behaviour problems were reported during the past 6 months.

Selected items from the DBC2 copyright© 2018 by Western Psychological Services. Reprinted by T. Le, University of Queensland, by permission of the publisher, WPS. Any additional use permitted in whole or in part for any other purpose without the prior, written authorization of WPS (rights@wpspublish.com).
